# Supplementary material for: Gene Expression-Related Changes in Morphologies of Organelles and Cellular Component Organization in Mucopolysaccharidoses
Source: MDPI journal article supplement (doi:10.3390/ijms22052766), 2021-03-09
Supplement: s1 [file s1]

## SUPPLEMENTARY MATERIAL

**Table S1.** Classification of MPS types.

| MPS Type | OMIM no.               |                | Deficient enzyme                                      |                 | GAG(s) stored in cells <sup>a</sup> |
|----------|------------------------|----------------|-------------------------------------------------------|-----------------|-------------------------------------|
|          | PMIM                   | Gene-locus MIM | Name                                                  | EC no.          |                                     |
| I        | 607014, 607015, 607016 | 252800         | $\alpha$ -L-iduronidase                               | <u>3.2.1.76</u> | HS, DS                              |
| II       | 309900                 | 300823         | 2-iduronate sulfatase                                 | <u>3.1.6.13</u> | HS, DS                              |
| IIIA     | 252900                 | 605270         | N-sulfoglucosamine sulphydrolase                      | <u>3.10.1.1</u> | HS (secondary storage of DS)        |
| IIIB     | 252920                 | 609701         | $\alpha$ -N-acetylglucosaminidase                     | 3.2.1.50        | HS (secondary storage of DS)        |
| IIIC     | 252930                 | 610453         | Acetyl-CoA: $\alpha$ -glucosaminide acetyltransferase | 2.3.1.78        | HS (secondary storage of DS)        |
| IIID     | 252940                 | 607664         | N-acetylglucosamine 6-sulfatase                       | 3.1.6.14        | HS (secondary storage of DS)        |
| IVA      | 253000                 | 612222         | N-acetylgalactosamine 6-sulfatase                     | 3.1.6.4         | KS, CS                              |
| IVB      | 253010                 | 611458         | $\beta$ -galactosidase-1                              | 3.2.1.23        | KS                                  |
| VI       | 253200                 | 611542         | N-acetylgalactosamine 4-sulfatase                     | 3.1.6.12        | DS                                  |
| VII      | 253220                 | 611499         | $\beta$ -glucuronidase                                | 3.2.1.31        | HS, DS, CS                          |
| IX       | 601492                 | 607071         | Hyaluronidase-1                                       | 3.2.1.35        | HA                                  |

<sup>a</sup>Abbreviations: CS, chondroitin sulfate; DS, dermatan sulfate; HA, hyaluronic acid; HS, heparan sulfate; KS, keratan sulfate.

**Table S2.** Characteristics of fibroblast lines used in this work.

| MPS type            | Mutated gene<br>and its locus | Mutation(s) in the used<br>fibroblast line <sup>a</sup> | Catalog<br>number of the cell line <sup>b</sup> |
|---------------------|-------------------------------|---------------------------------------------------------|-------------------------------------------------|
| MPS I               | <i>IDUA</i> , 4p16.3          | p.Trp402Ter/p.Trp402Ter                                 | GM00798                                         |
| MPS II              | <i>IDS</i> , Xp28             | p.His70ProfsTer29                                       | GM13203                                         |
| MPS IIIA            | <i>SGSH</i> , 17q25.3         | p.Glu447Lys/p.Arg245His                                 | GM00879                                         |
| MPS IIIB            | <i>NAGLU</i> , 17q21          | p.Arg626Ter/p.Arg626Ter                                 | GM00156                                         |
| MPS IIIC            | <i>HGSNAT</i> , 8p11.1        | Not determined                                          | GM05157                                         |
| MPS IIID            | <i>GNS</i> , 12q14            | p.Arg355Ter/p.Arg355Ter                                 | GM05093                                         |
| MPS IVA             | <i>GALNS</i> , 16q24.3        | Not determined                                          | GM00593                                         |
| MPS IVB             | <i>GLB1</i> , 3p22.3          | p.Trp273Leu/p.Trp509Cys                                 | GM03251                                         |
| MPS VI              | <i>ARSB</i> , 4q14.1          | Not determined                                          | GM03722                                         |
| MPS VII             | <i>GUSB</i> , 7q21.11         | p.Trp627Cys/p.Arg356Ter                                 | GM00121                                         |
| MPS IX              | <i>HYAL1</i> , 3p.21.3        | Not determined                                          | GM17494                                         |
| Control line (HDFa) | N/A                           | N/A                                                     | N/A                                             |

(a) When mutations were not determined, the diagnosis of specific MPS type was based on analysis of urinary GAG levels, with indication of kind(s) of GAG(s) with elevated amounts in tested samples, and biochemical determination of deficiency of particular lysosomal enzyme in leukocytes; phenotypes of all patients were severe, according to available data. (b) Catalog numbers are according to cell line description in NIGMS Human Genetic Cell Repository at the Coriell Institute for Medical Research.

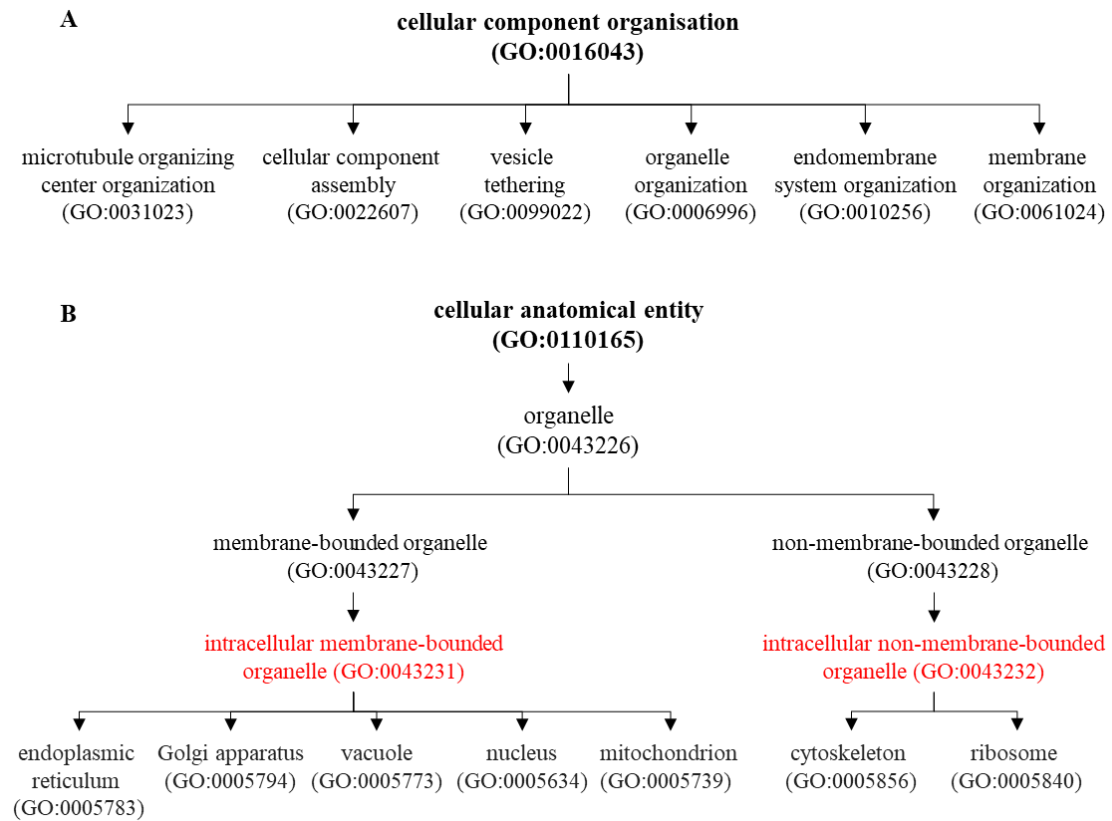

**Figure S1.** Child terms (with GO numbers) of ‘cellular component organization’ (GO:0016043) (A) and ‘cellular anatomical entity’ (GO:0110165) (B) terms, considered in detailed transcriptomic analyzes performed in this study.
